# Supplementary material for: Molecular Screening for High-Risk Human Papillomaviruses in Patients with Periodontitis
Source: MDPI journal article supplement (doi:10.3390/v15030809), 2023-03-22
Supplement: s1 [file s1]

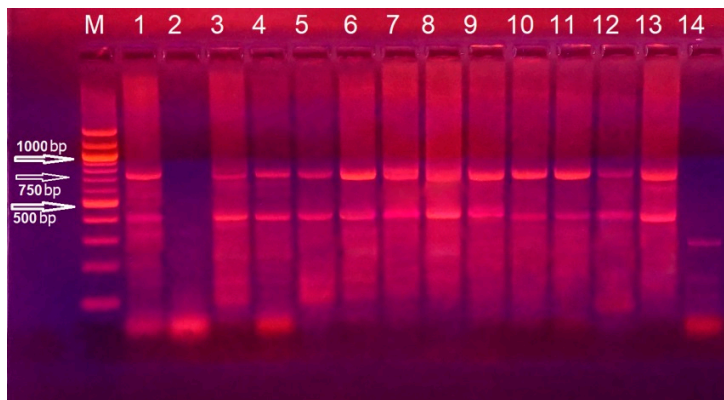

**Figure S1.** Gel electrophoresis of the HPV positive samples (lines 1, 3-13) with primers GPE6/5B/6B (700 bp) and MY09/11 (450 bp). M – 100 bp DNA ladder; Line 2 – negative control; 14 – beta globin (268 bp).
